# Supplementary material for: AMP activated kinase negatively regulates hepatic Fetuin-A via p38 MAPK-C/EBPβ/E3 Ubiquitin Ligase Signaling pathway
Source: PubMed Central journal article supplement (PMC9075660; doi:10.1371/journal.pone.0266472), 2022-05-06

Figure 1A

HepG2 cells

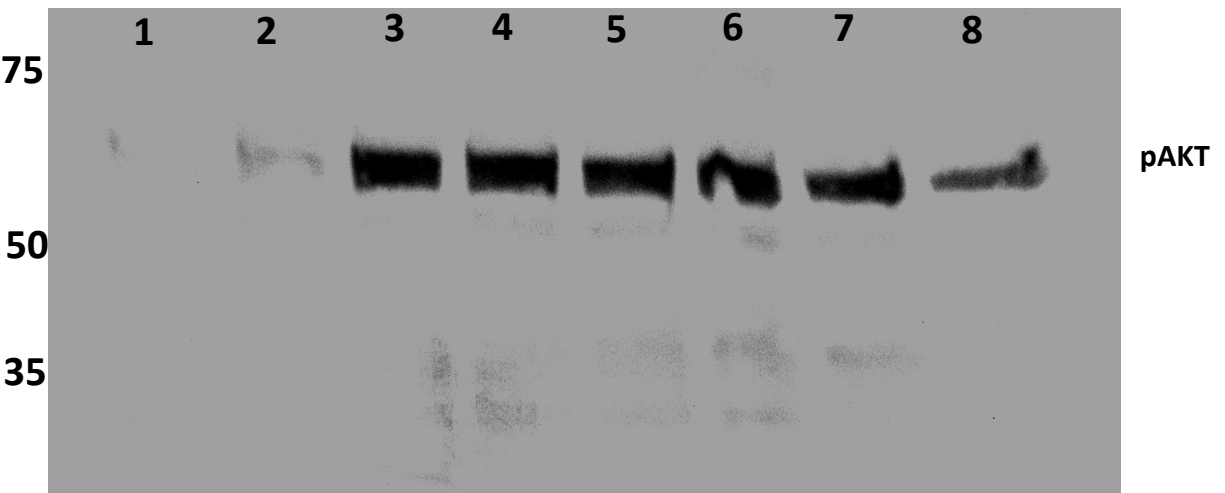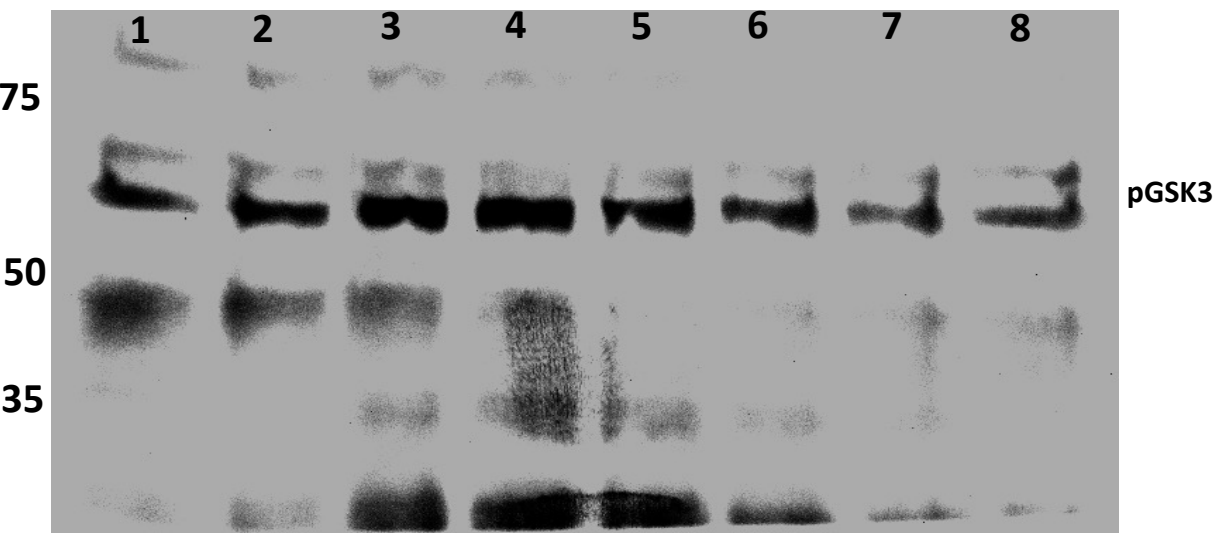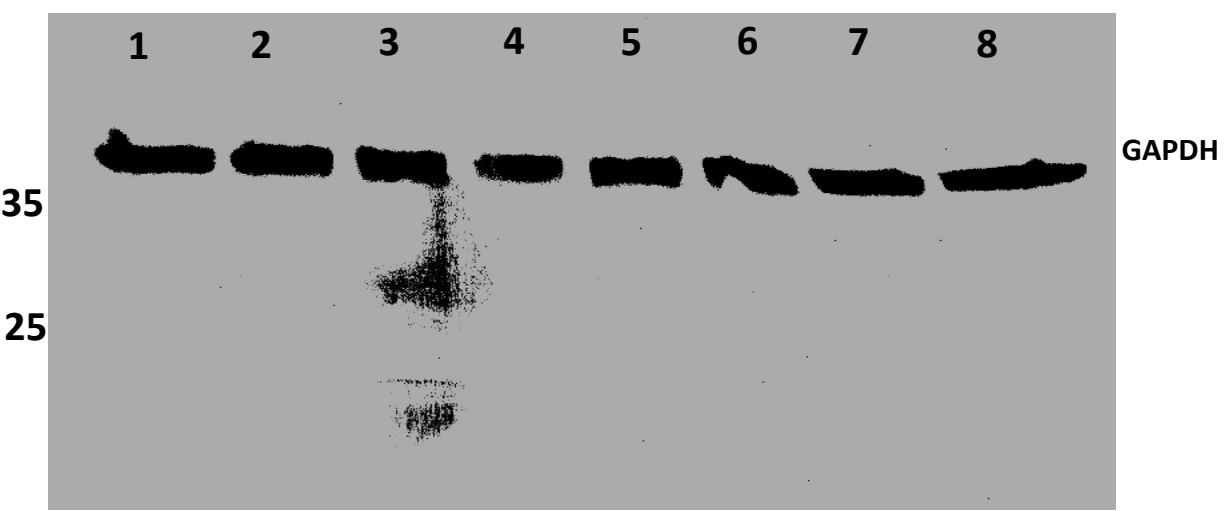

Figure 2A

HepG2 cells lysate

× × × × × ×

1 2 3

75  
50

Fet-A

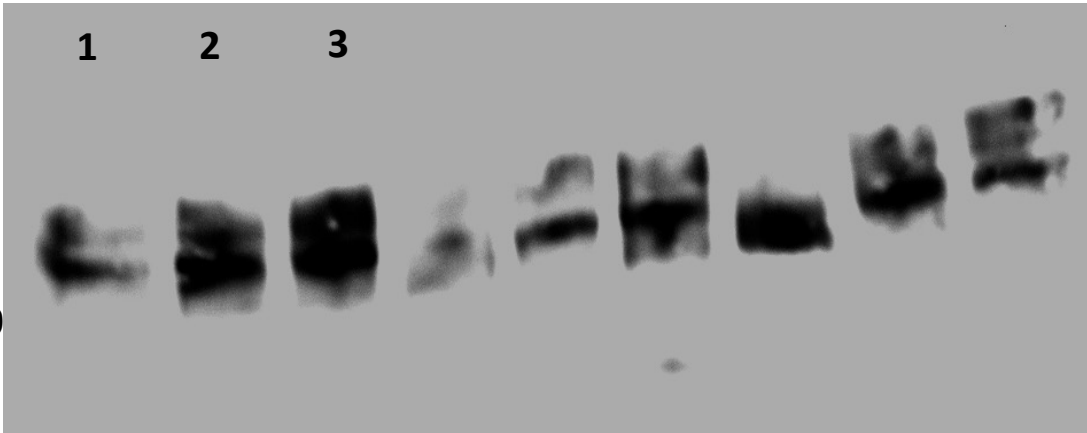

× × × × × ×

1 2 3

75  
50

pFet-A

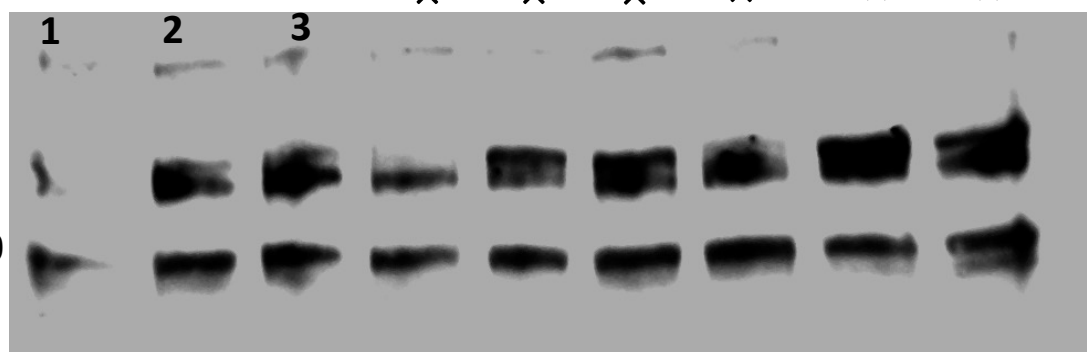

× × ×

75  
50  
35

GAPDH

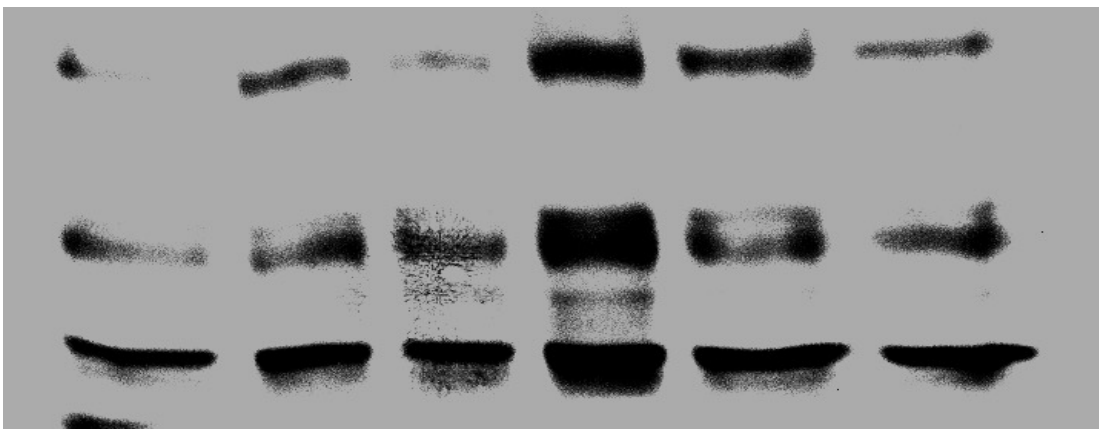

Figure 2A

HepG2 cell (Media)

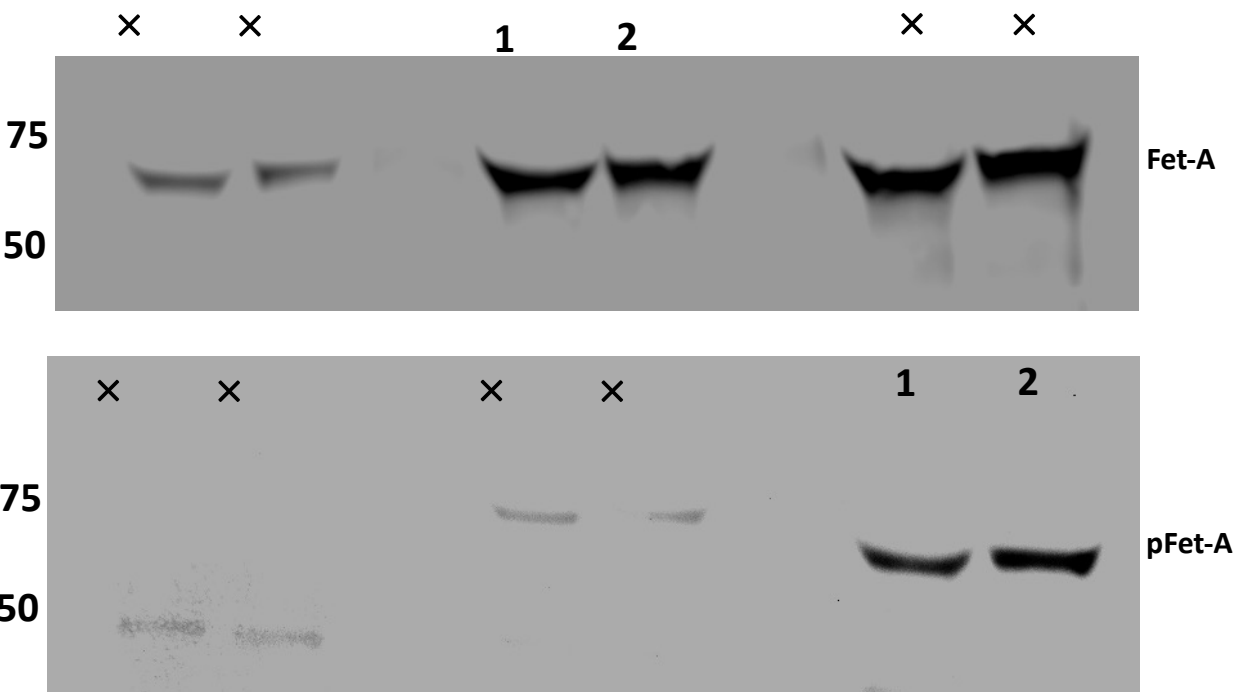

Figure 2B

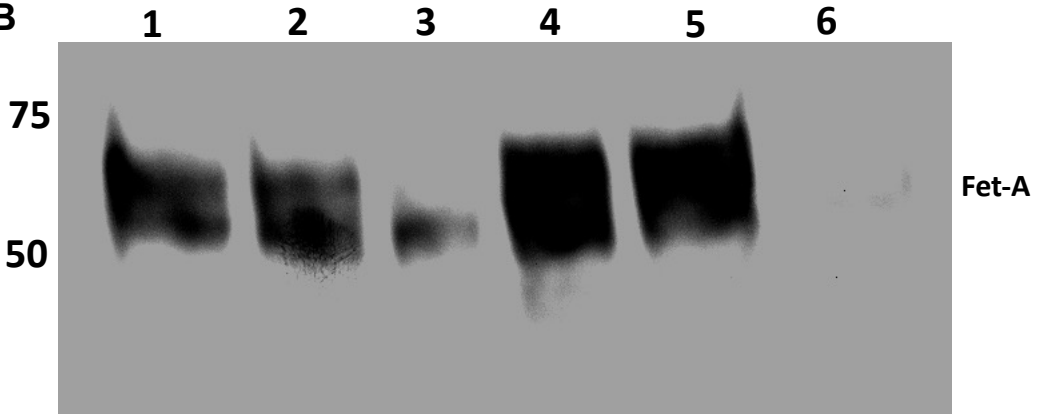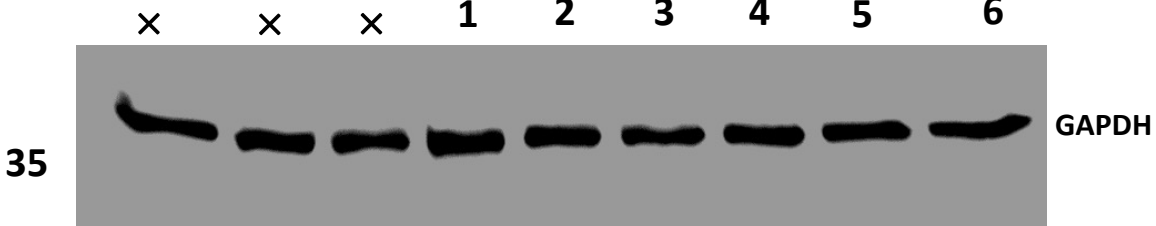

**Figure 2C**

**Cell lysate**

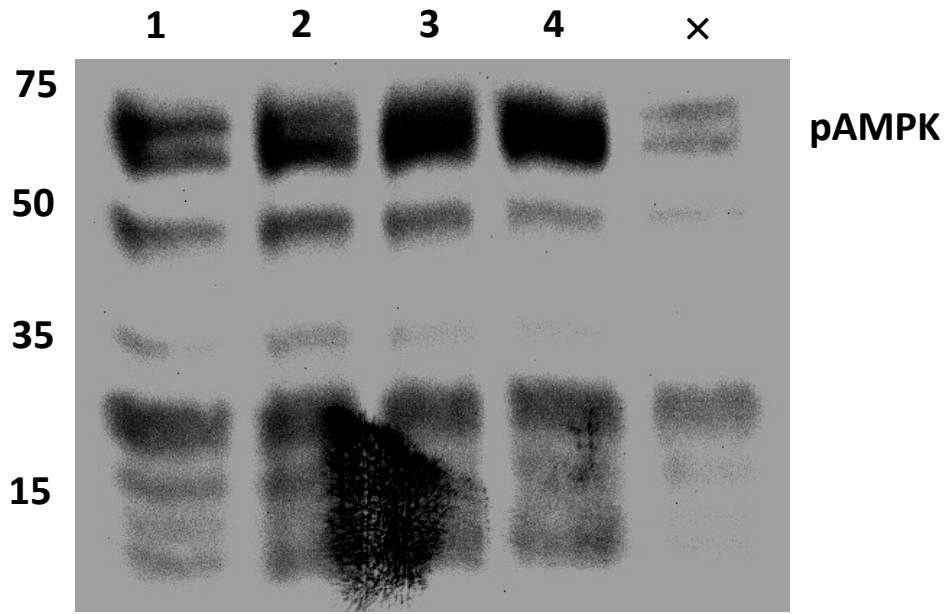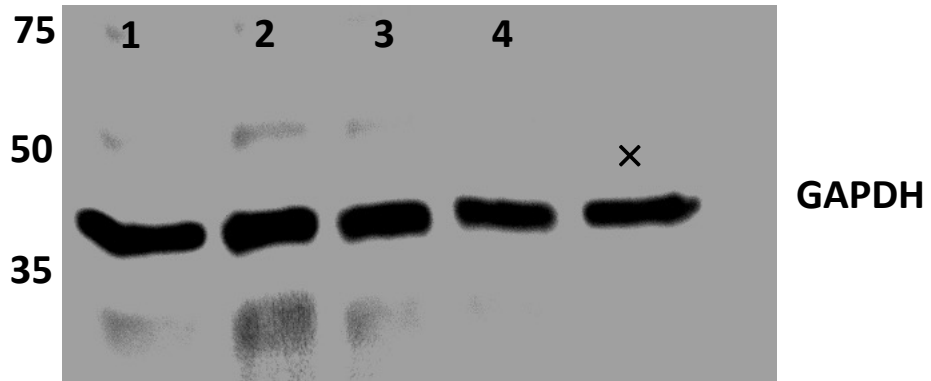

**Media**

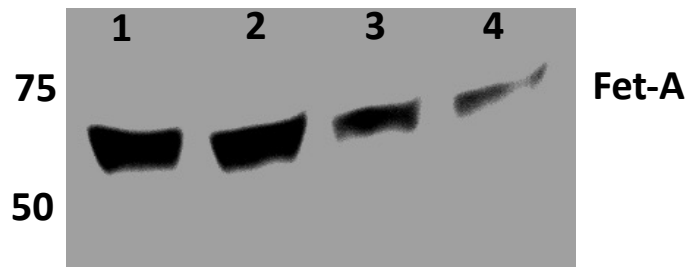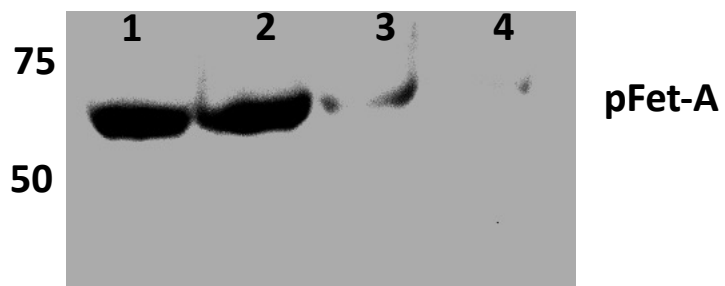

**Figure 2G**

**HepG2 cells**

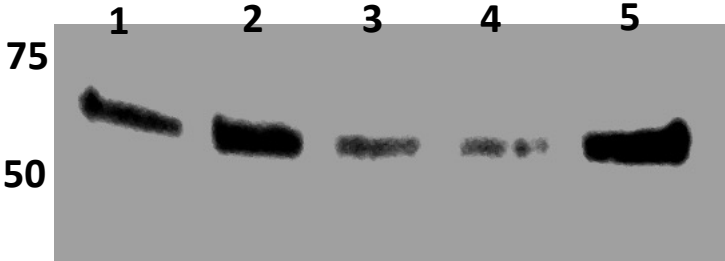

**pAMPK**

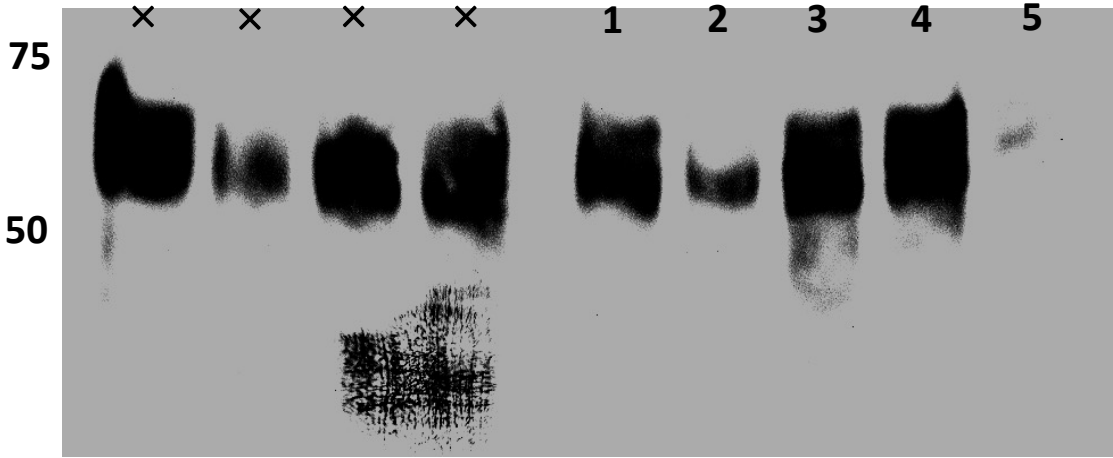

**Fet-A**

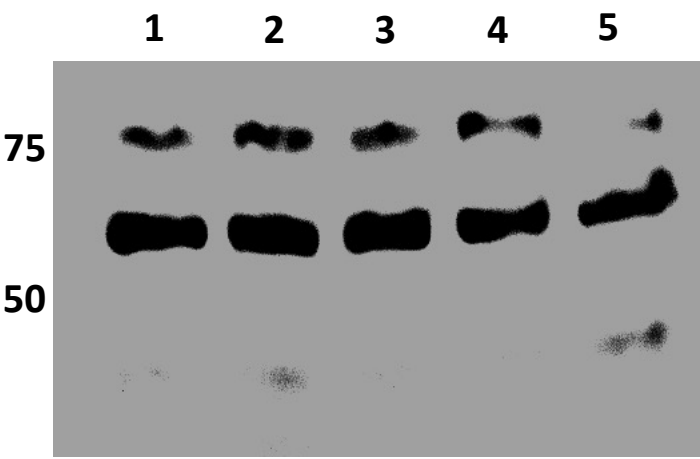

**pFet-A**

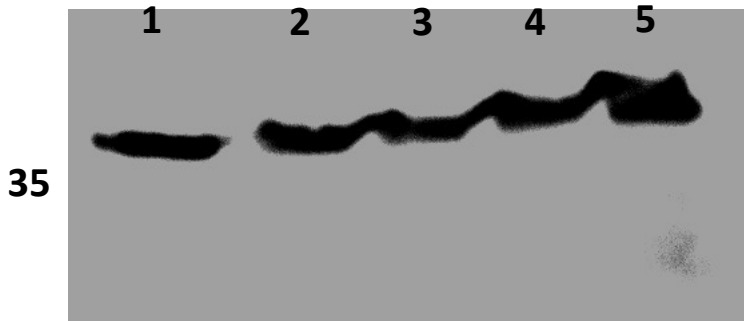

**GAPDH**

Figure 3A

HepG2 cells

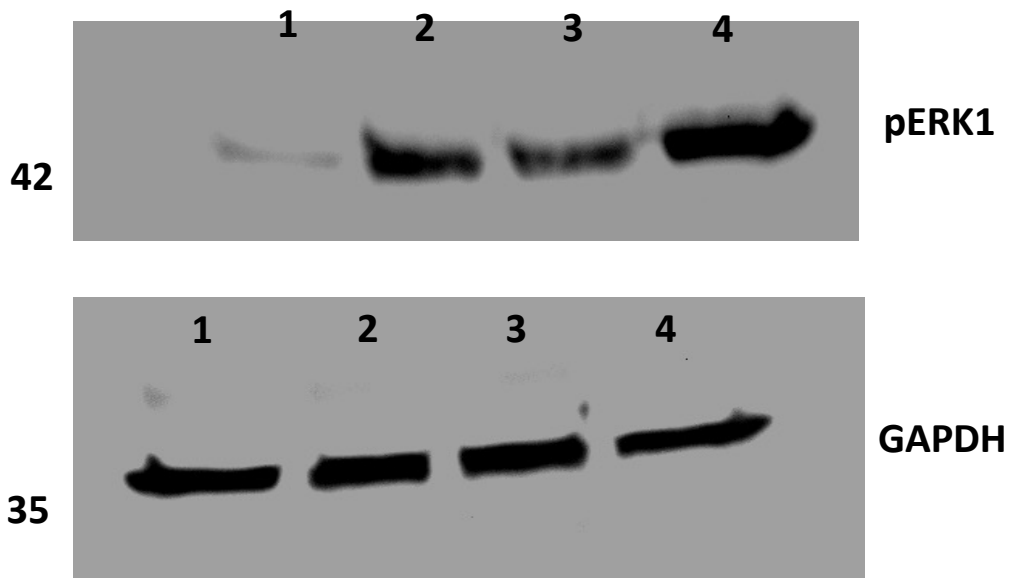

**Figure 3B**

**HepG2 cells**

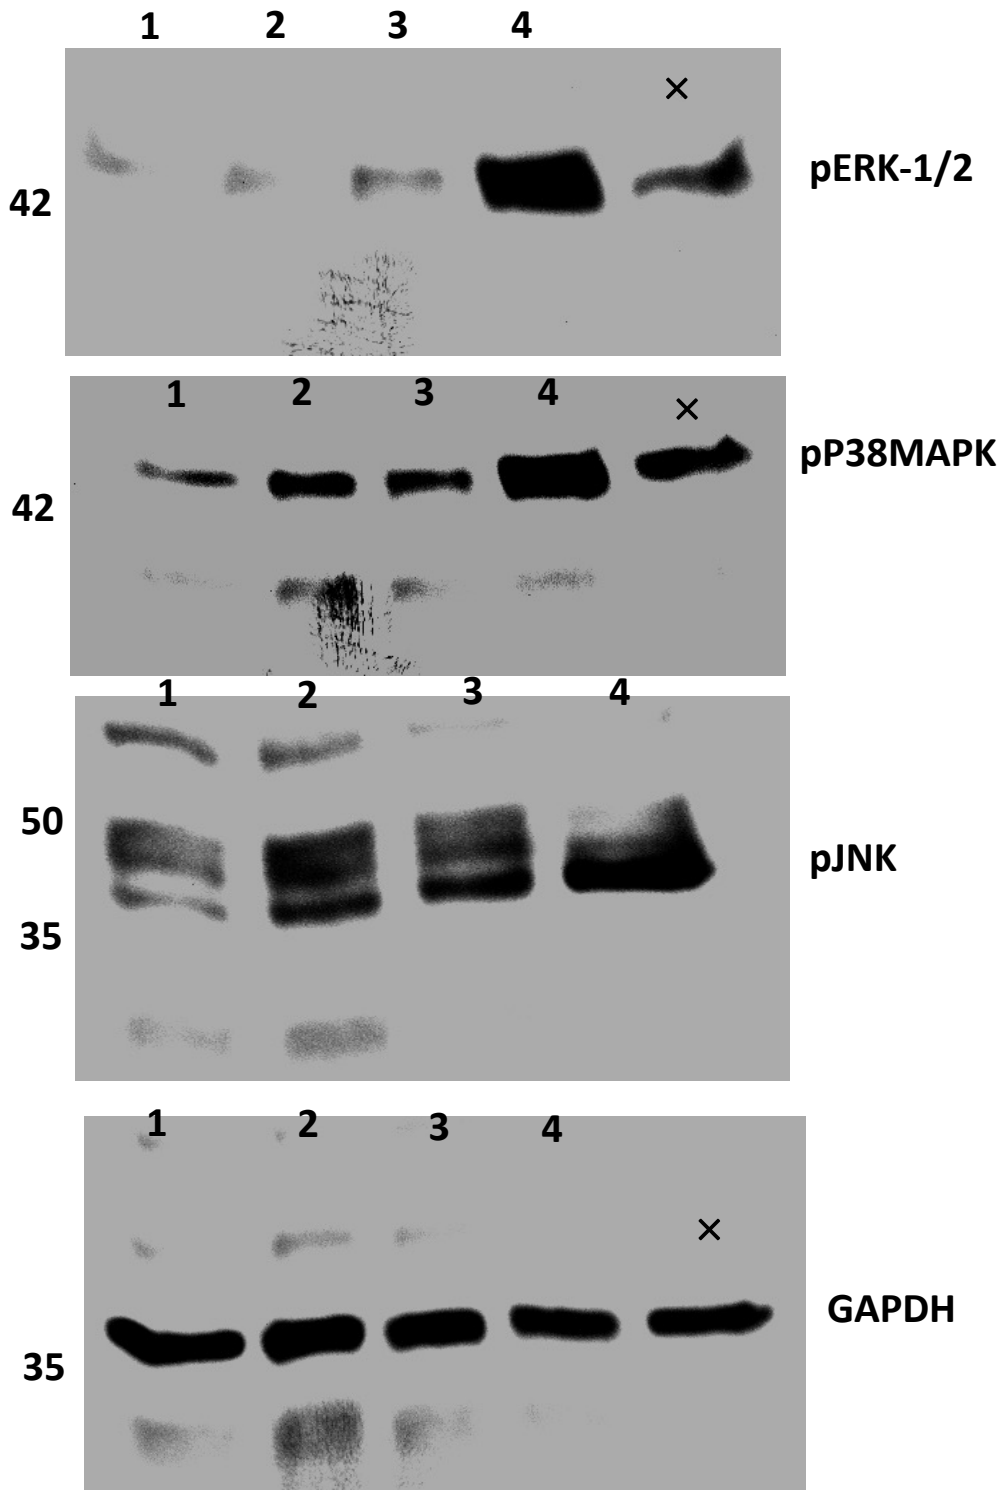



Figure 3C

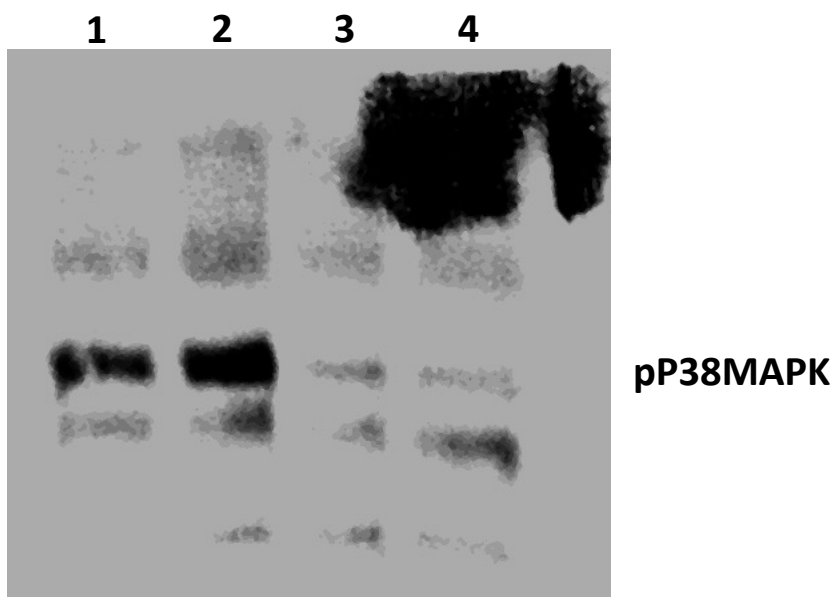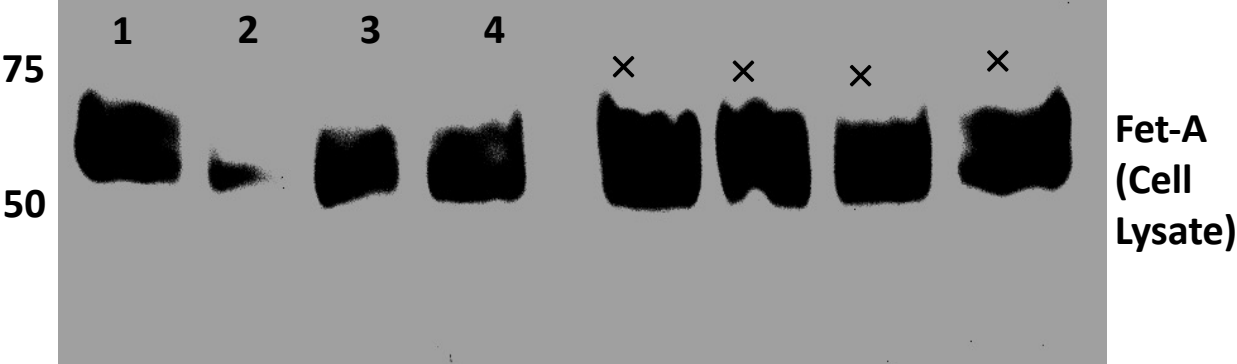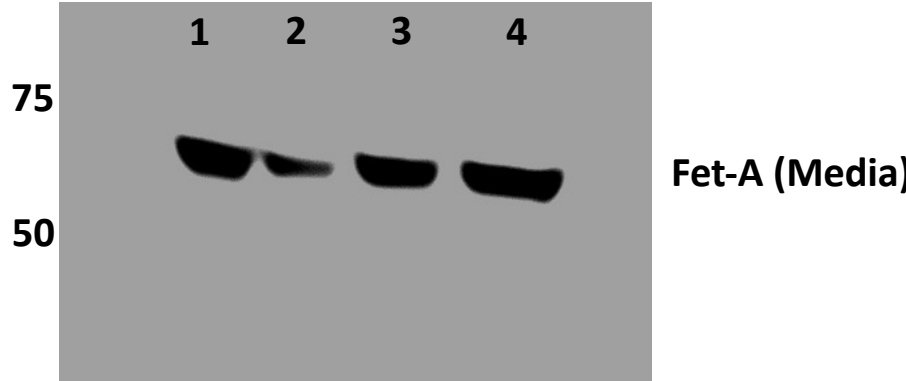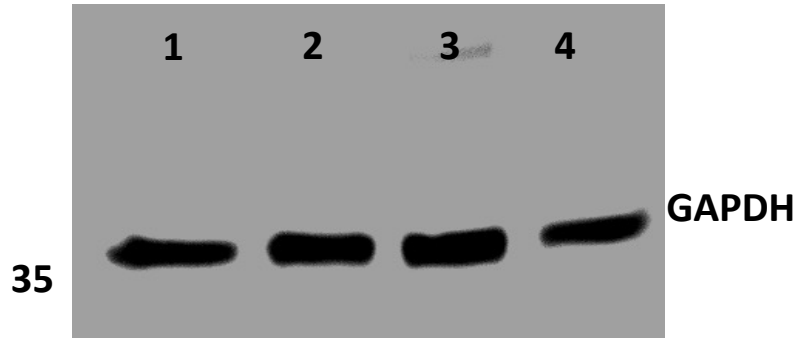

Figure 3E

HepG2 cells

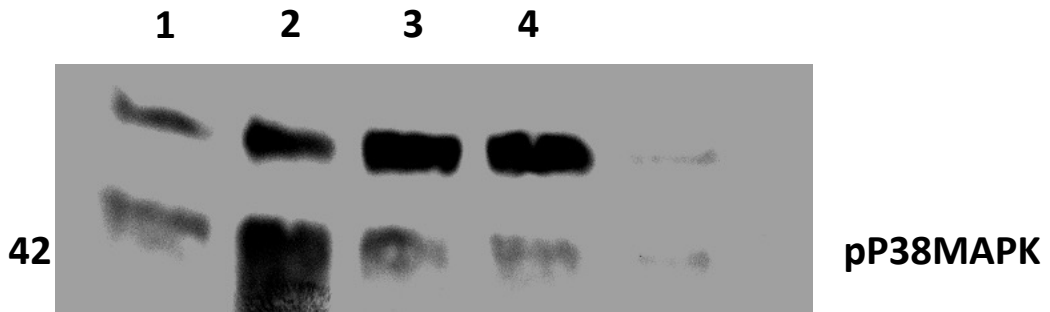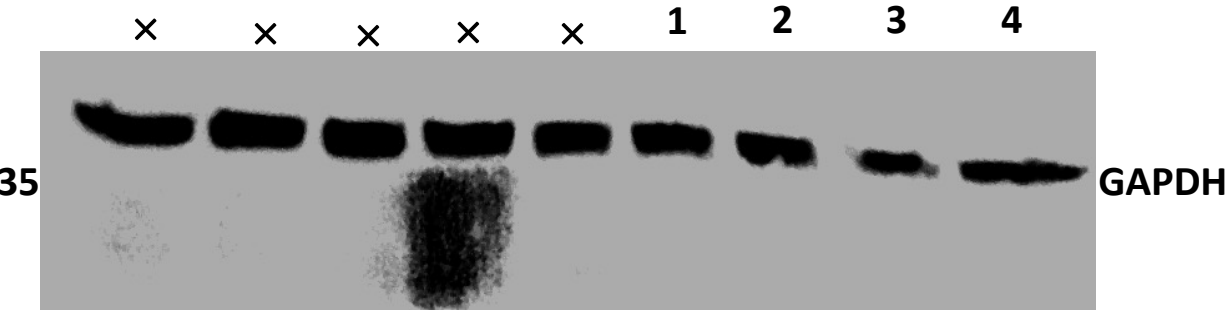

**Figure 3G**

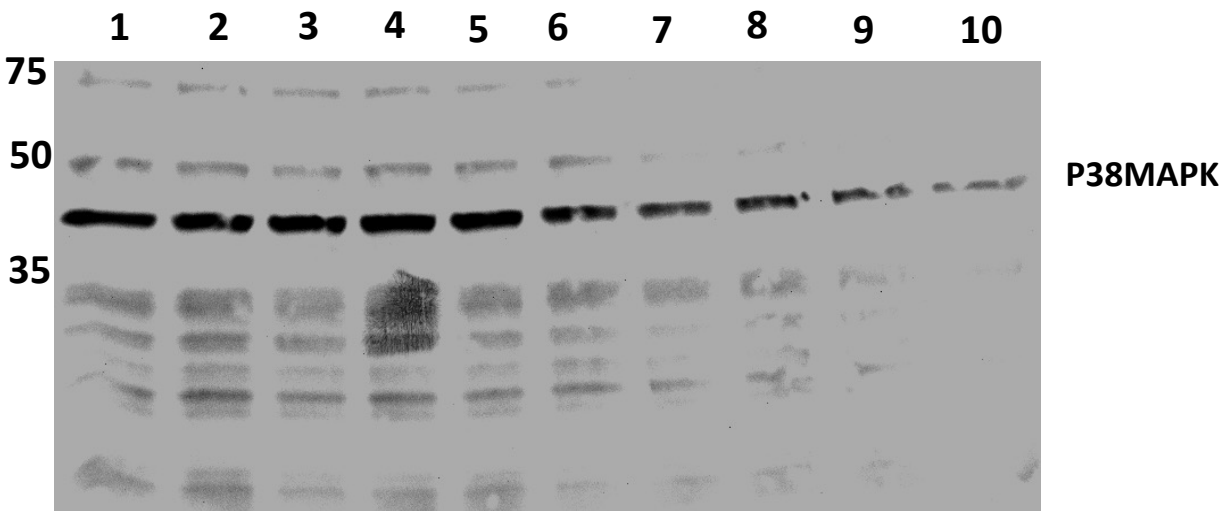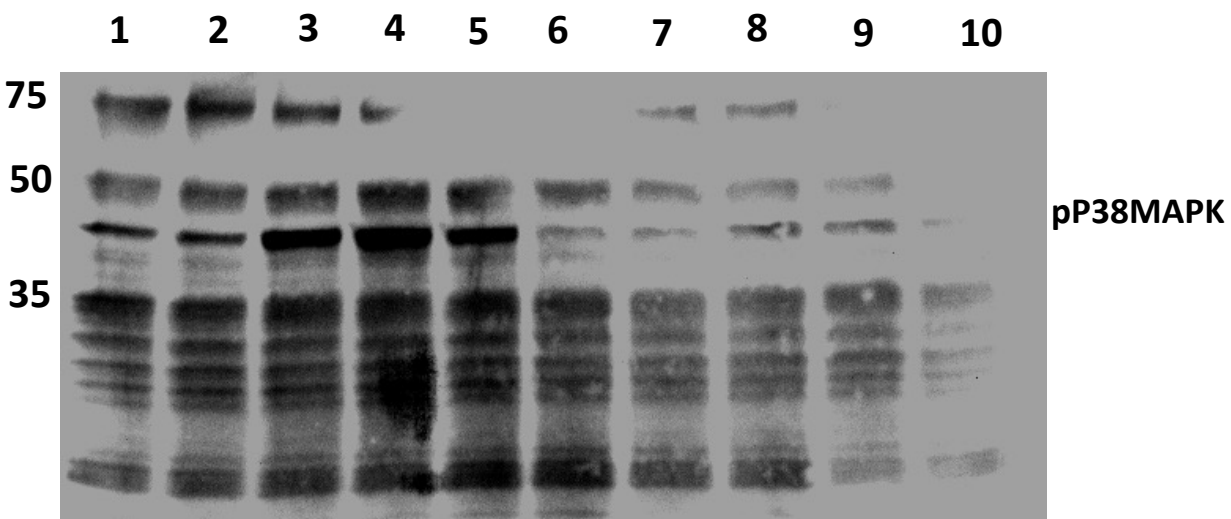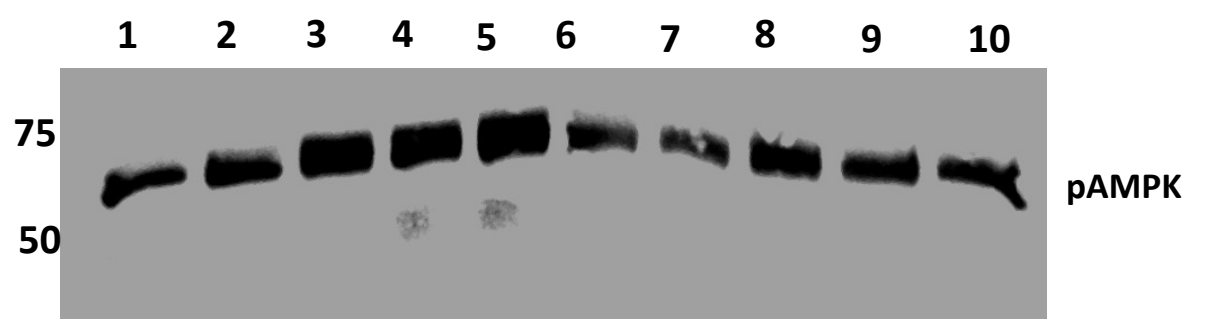



**Figure 3J**

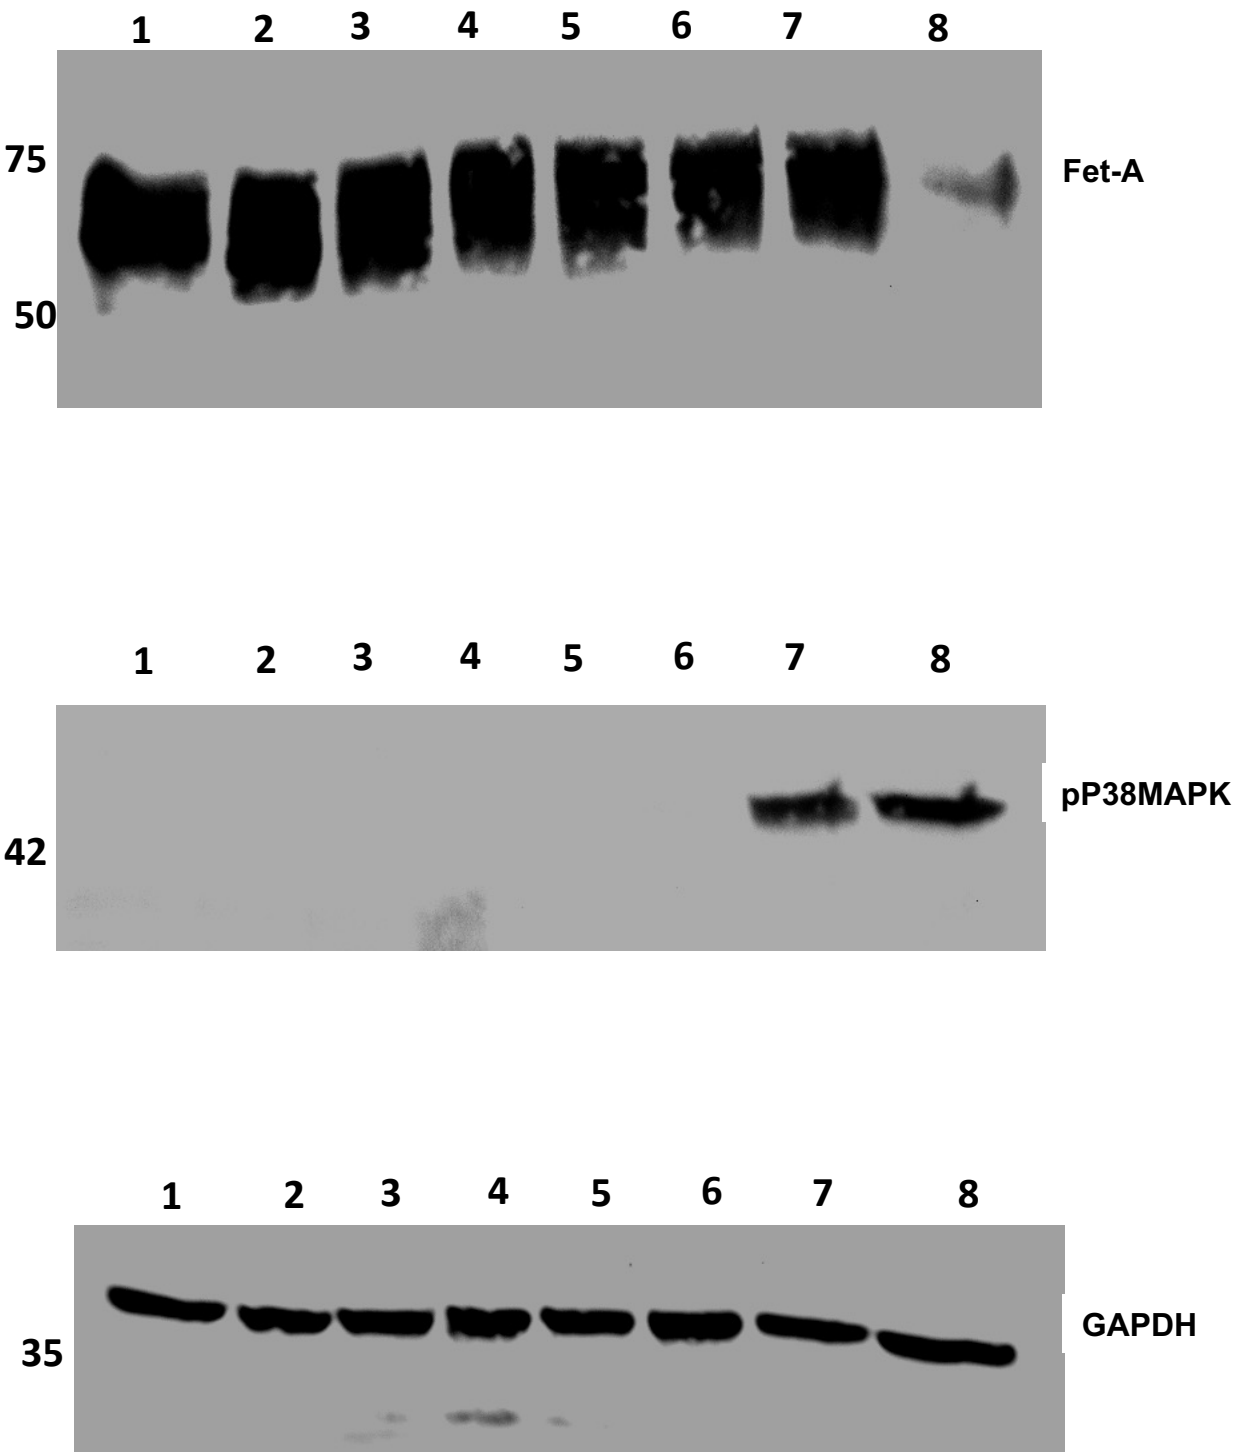

**Figure 4A**

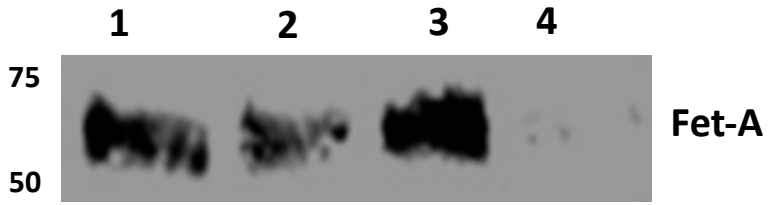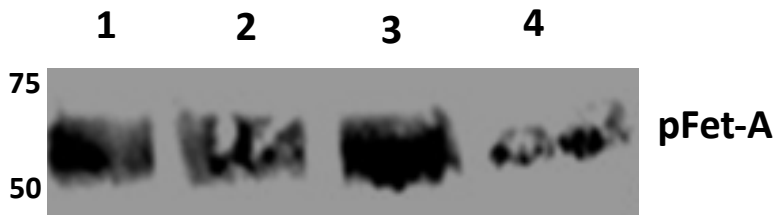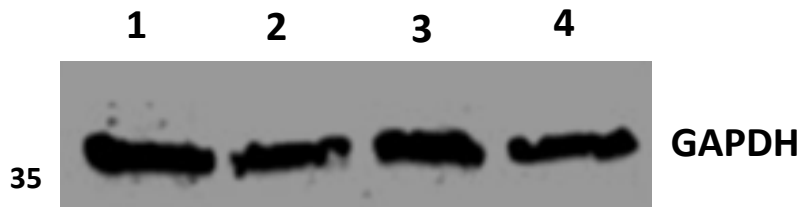

**Figure 4C**

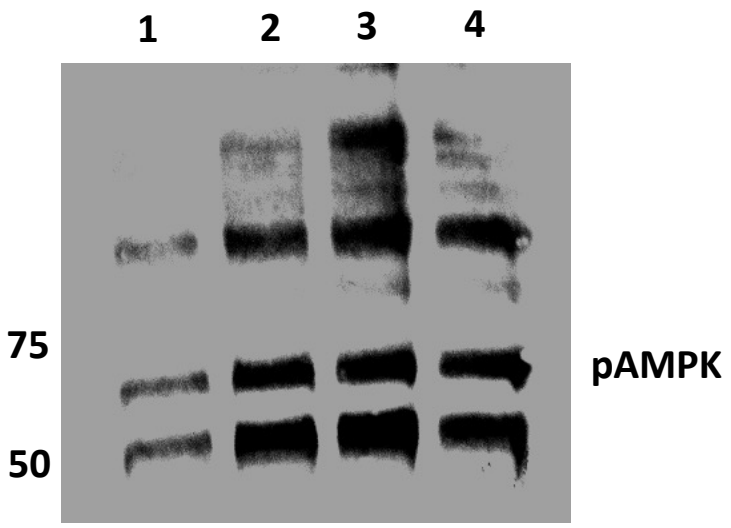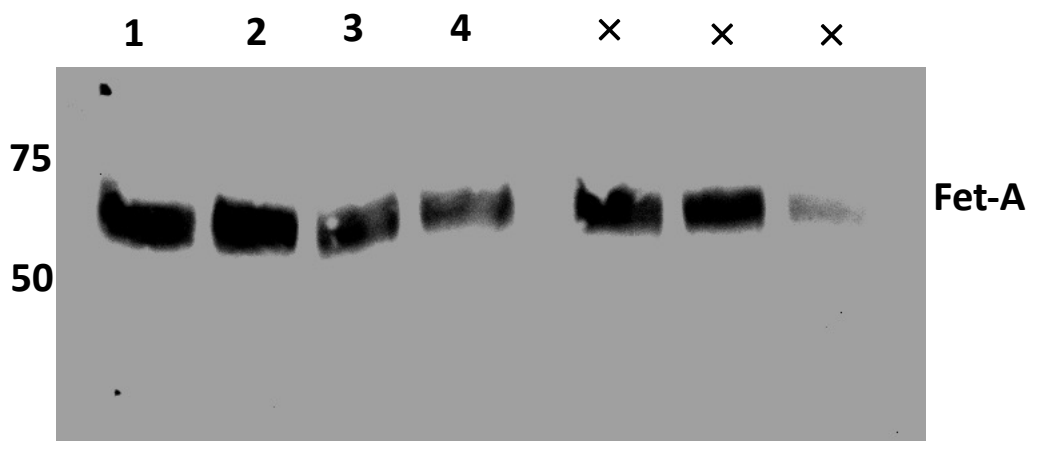

**Figure 4C**

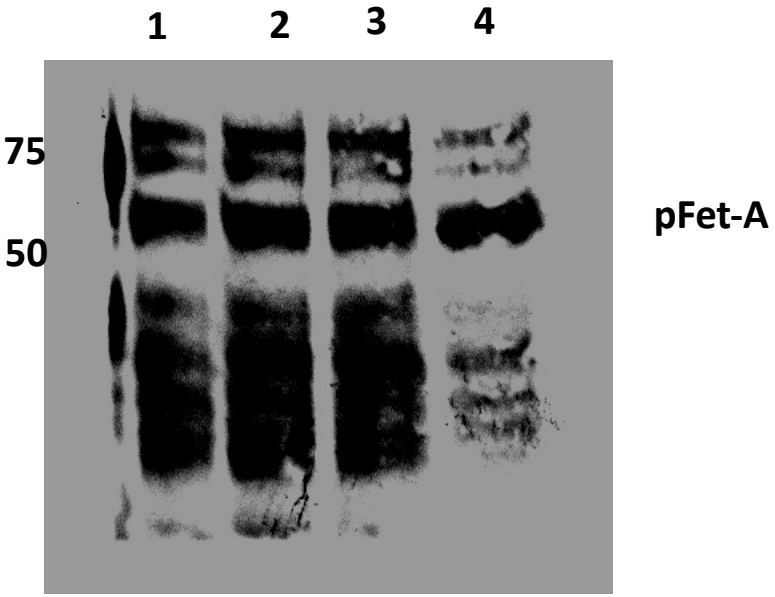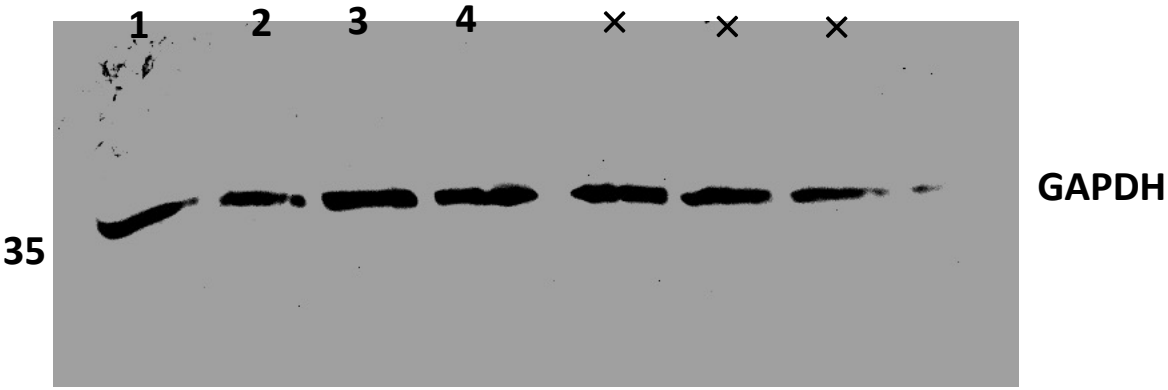



**Figure 4E**

**Hep3B cells**

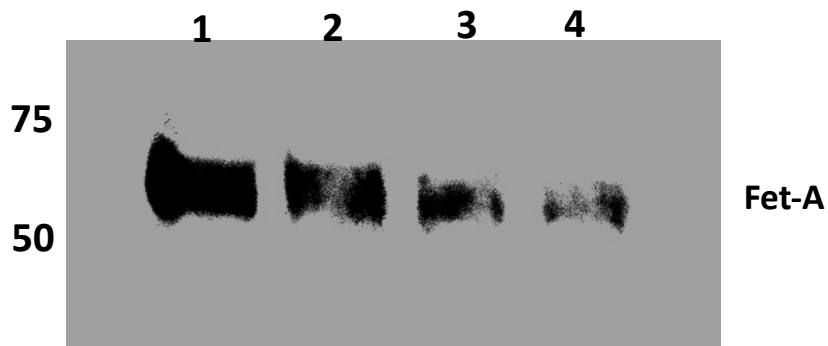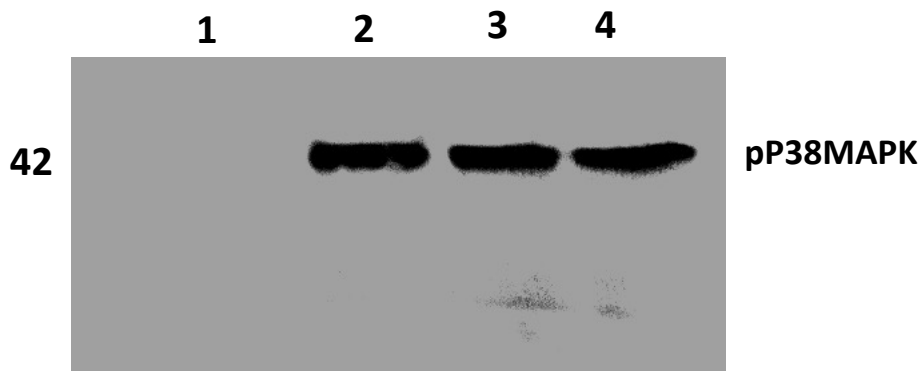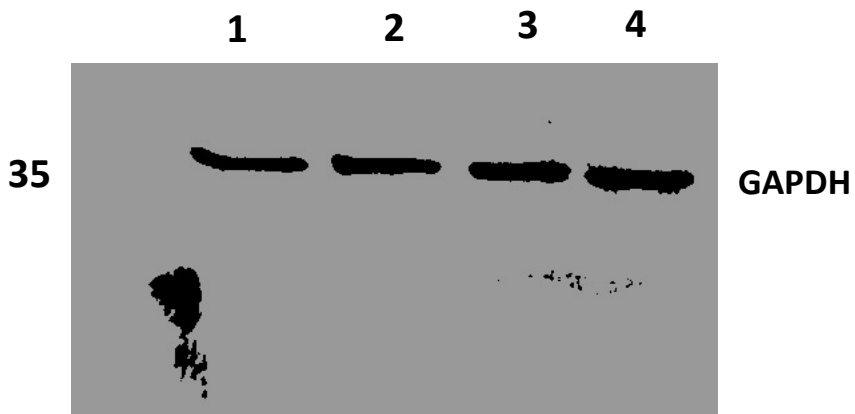

**Figure 4G**

**Primary rat hepatocytes**

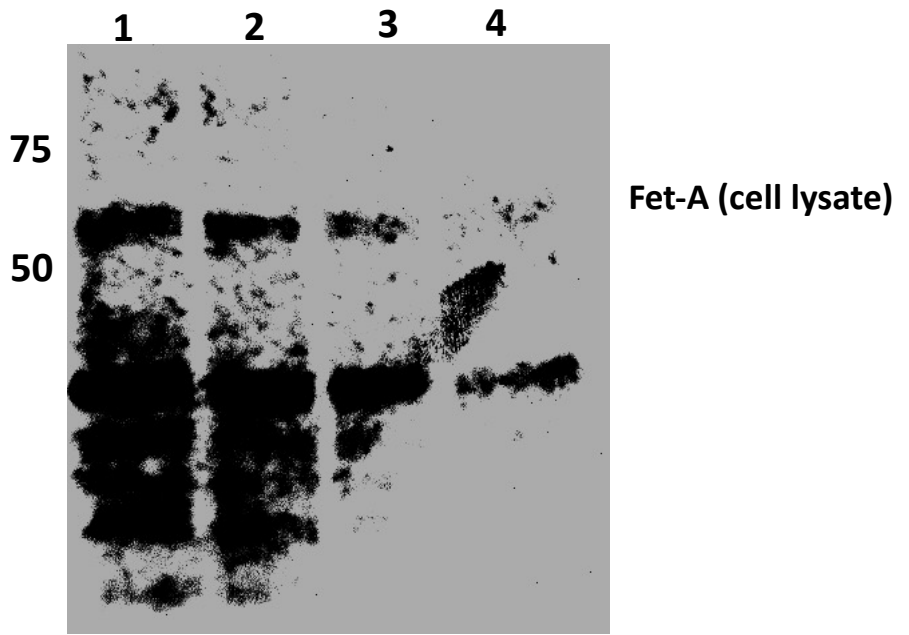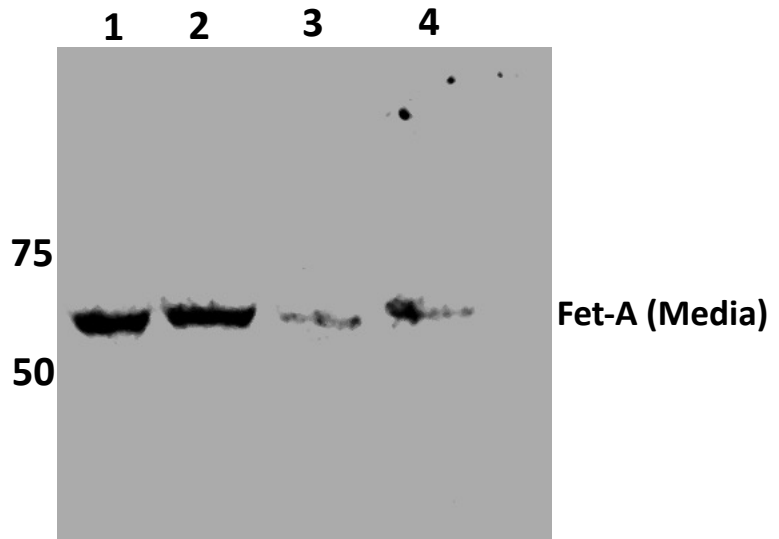

**Figure 4G**

**Primary rat hepatocytes**

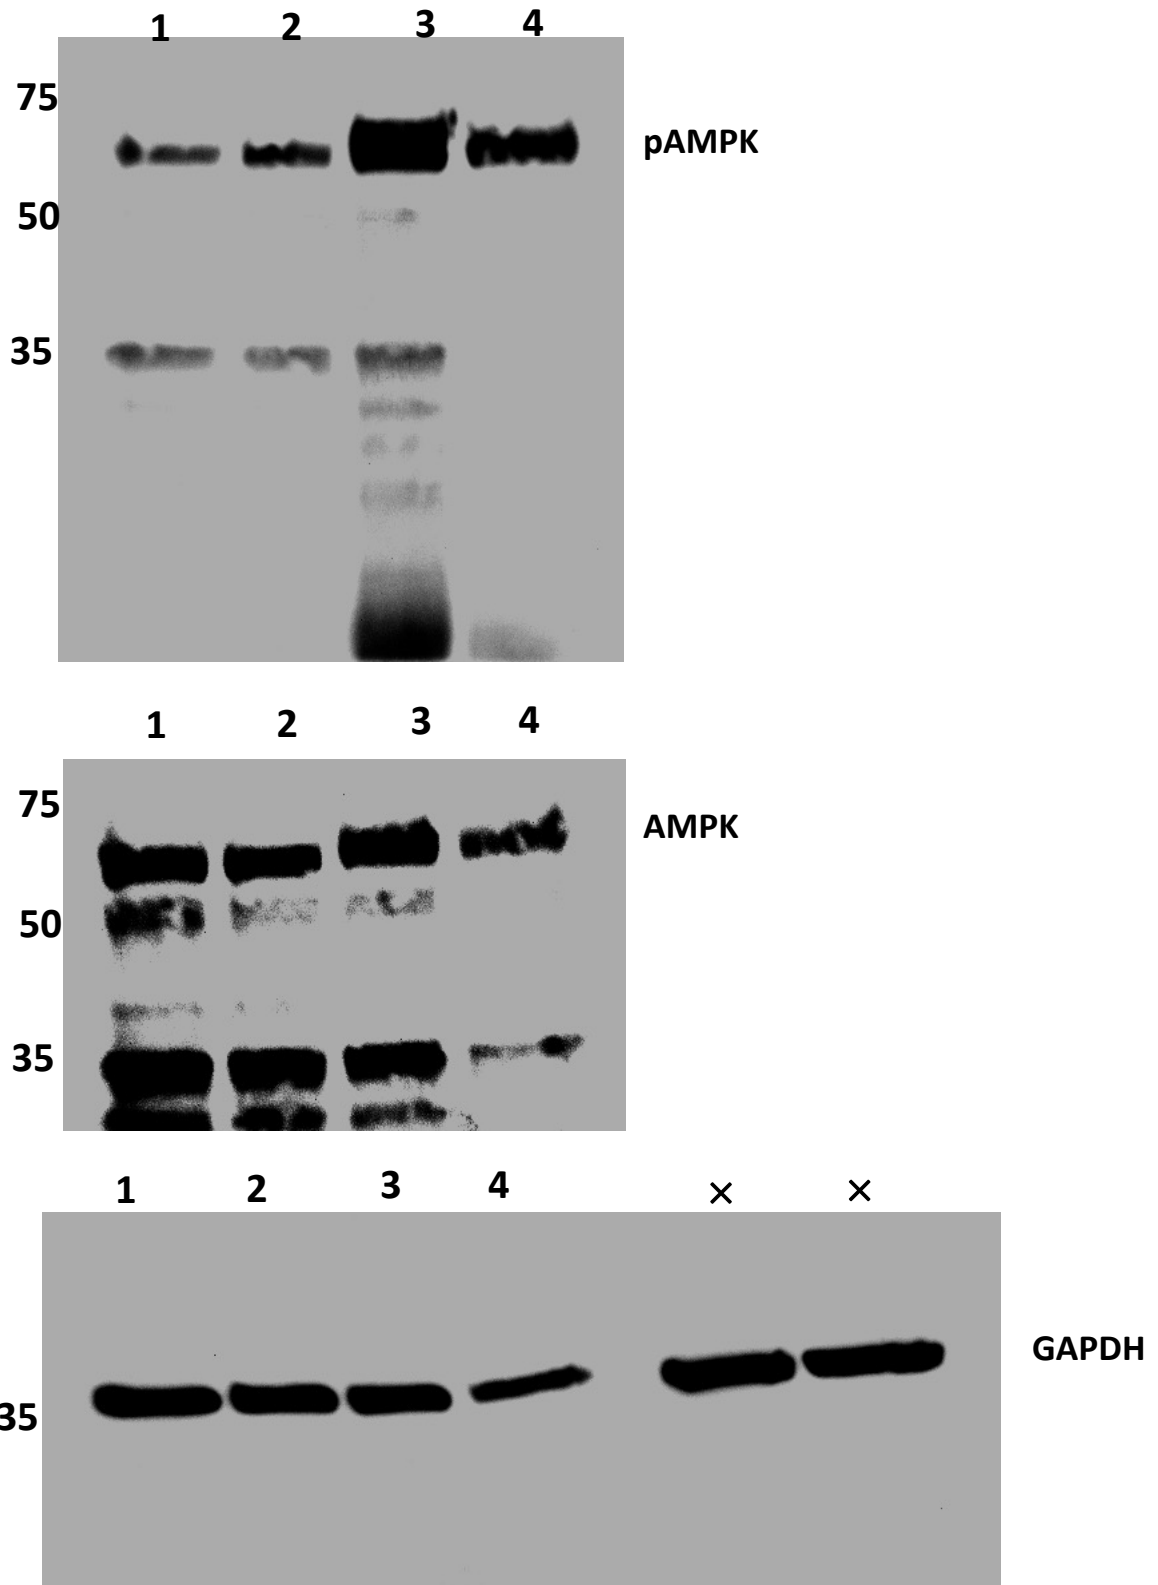

**Figure 4G**

**Primary rat hepatocytes**

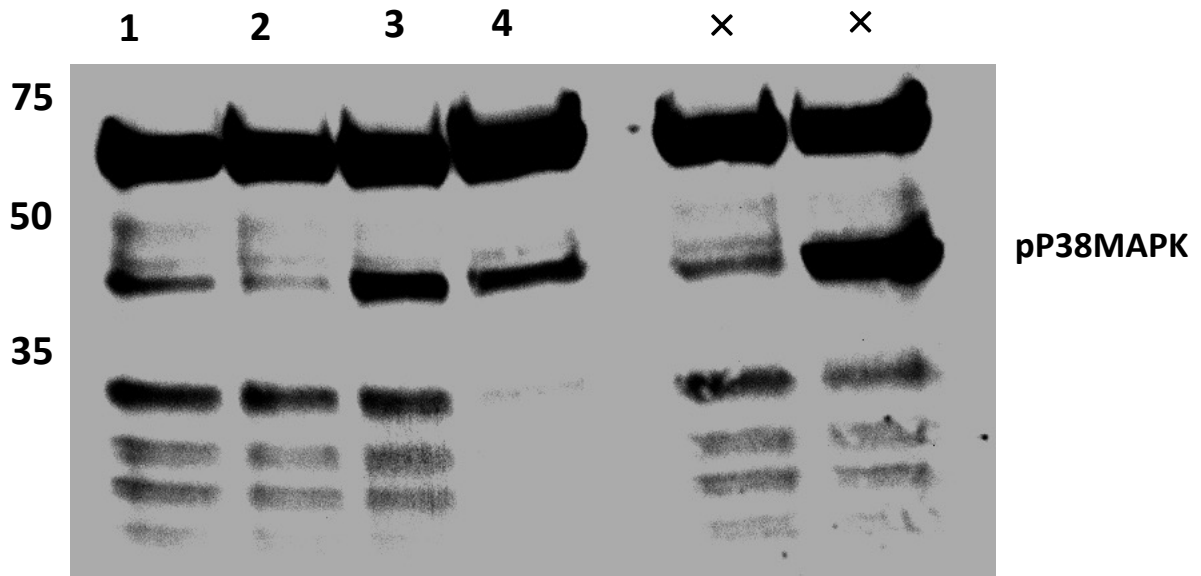

**Figure 4I**

**Primary rat hepatocytes**

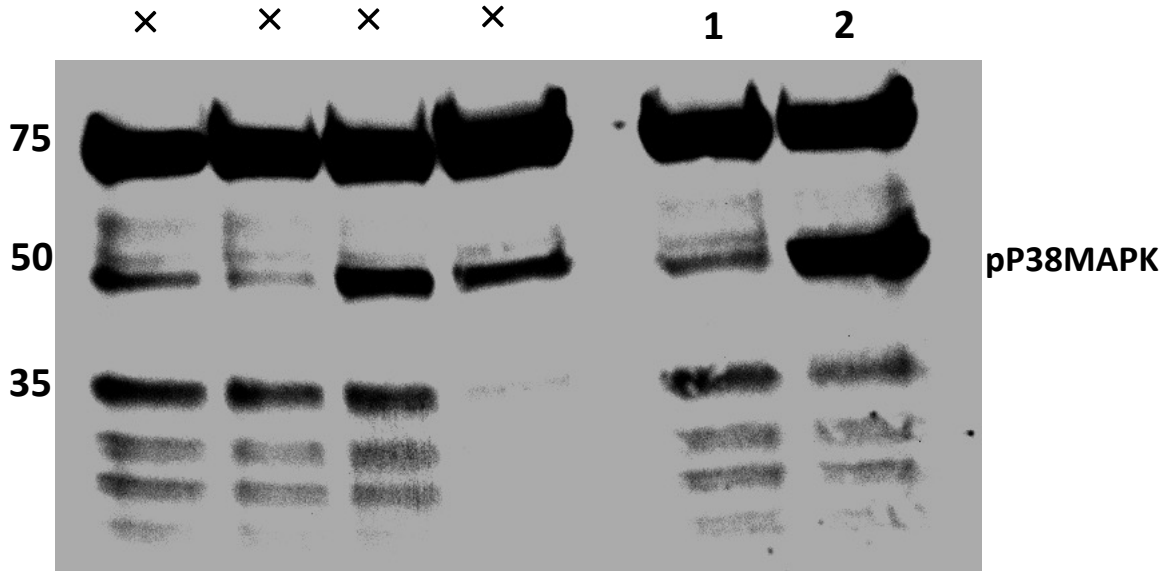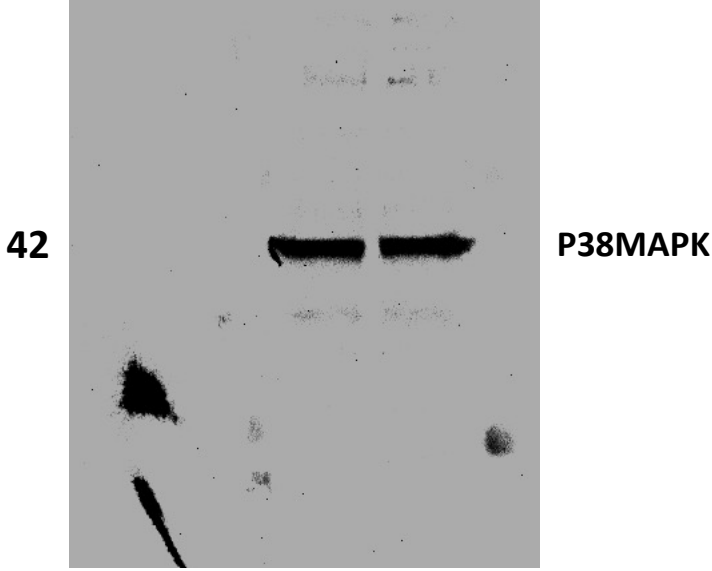

**Figure 4I**

**Primary rat hepatocytes**

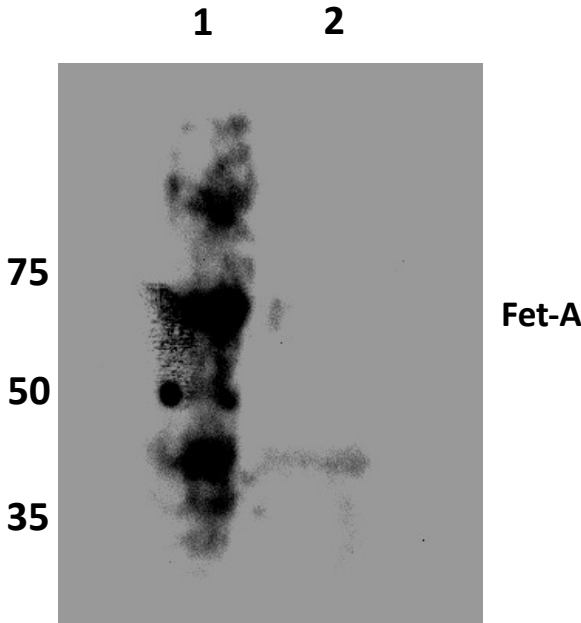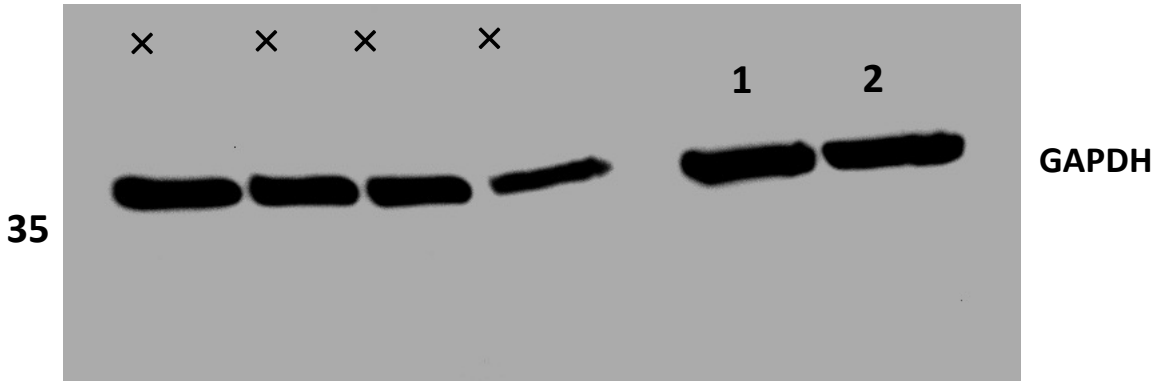

Figure 5A

HepG2 cells

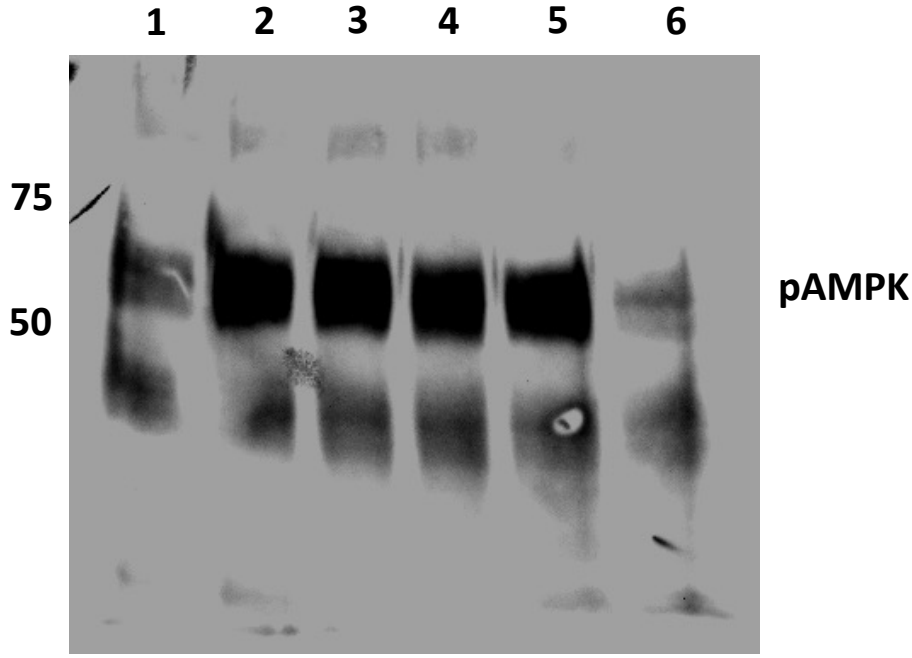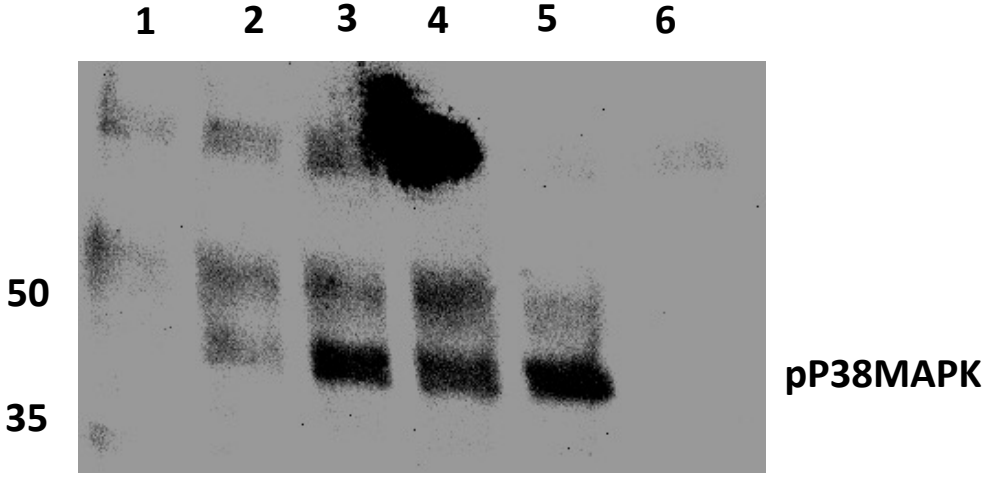

Figure 5A

HepG2 cells

1 2 3 4 5 6

75

50

Fet-A

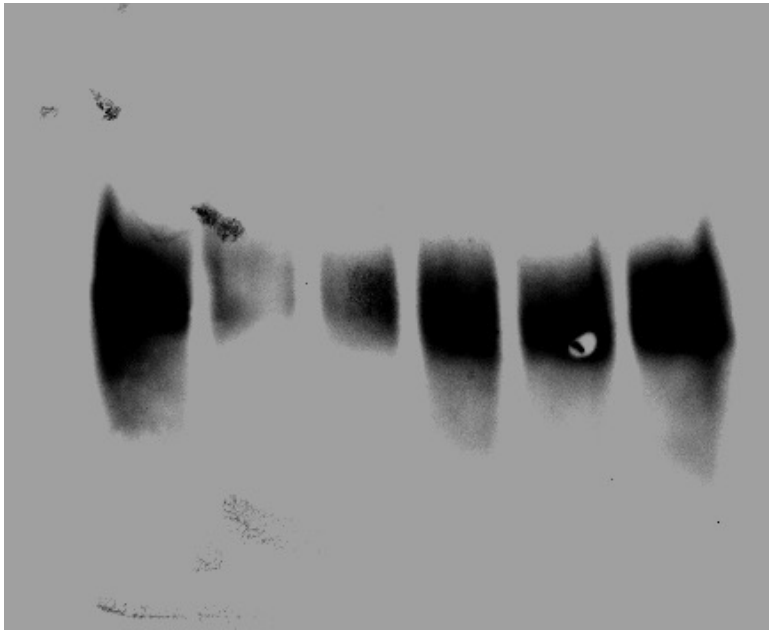

1 2 3 4 5 6

75

50

35

GAPDH

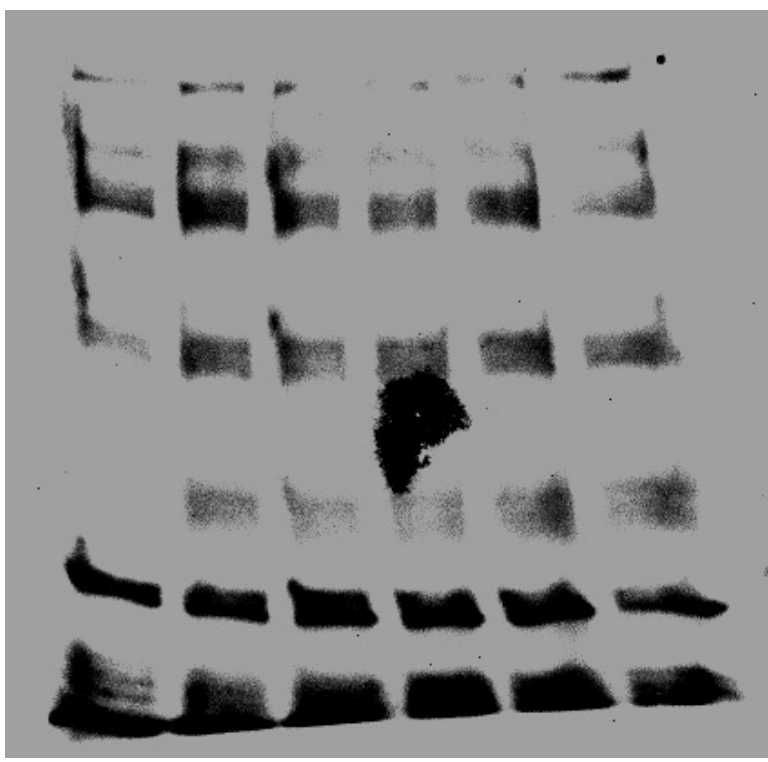



Figure 5C

HepG2 cells

1 2 3 4

150  
100  
75  
50

WB: Ub  
IP: Fet-A

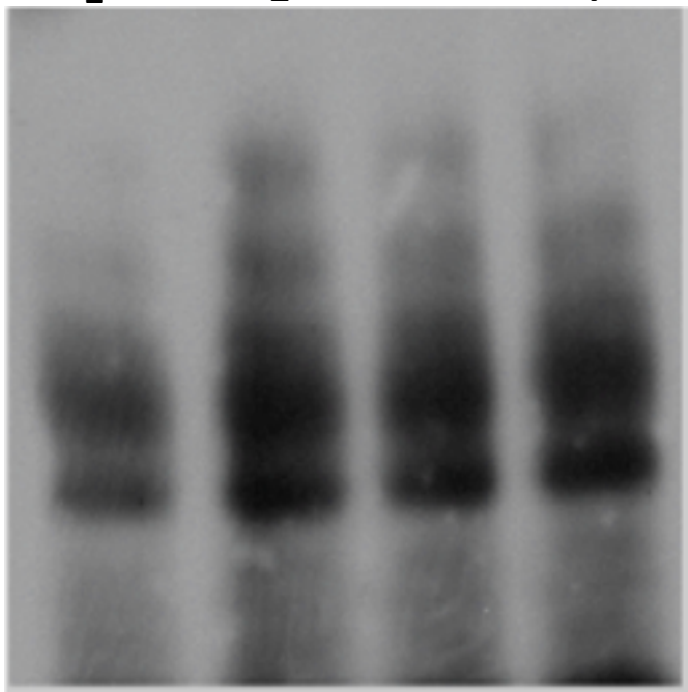

1 2 3 4

75  
50

IP: Fet-A

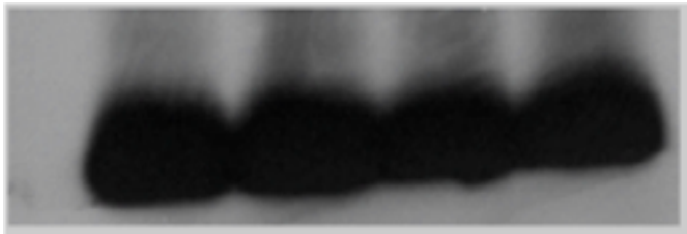

1 2 3 4

75  
50

Fet-A  
(Whole cell lysate)

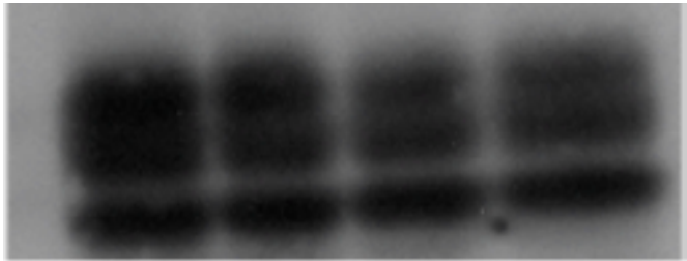

1 2 3 4

35

GAPDH  
(Whole cell lysate)

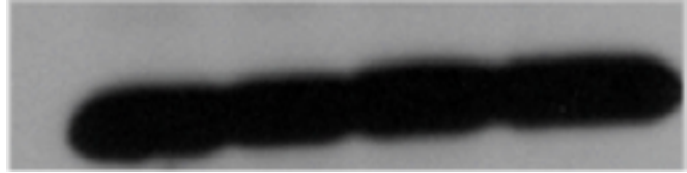

Figure 5D

HepG2 cells (12 hr)

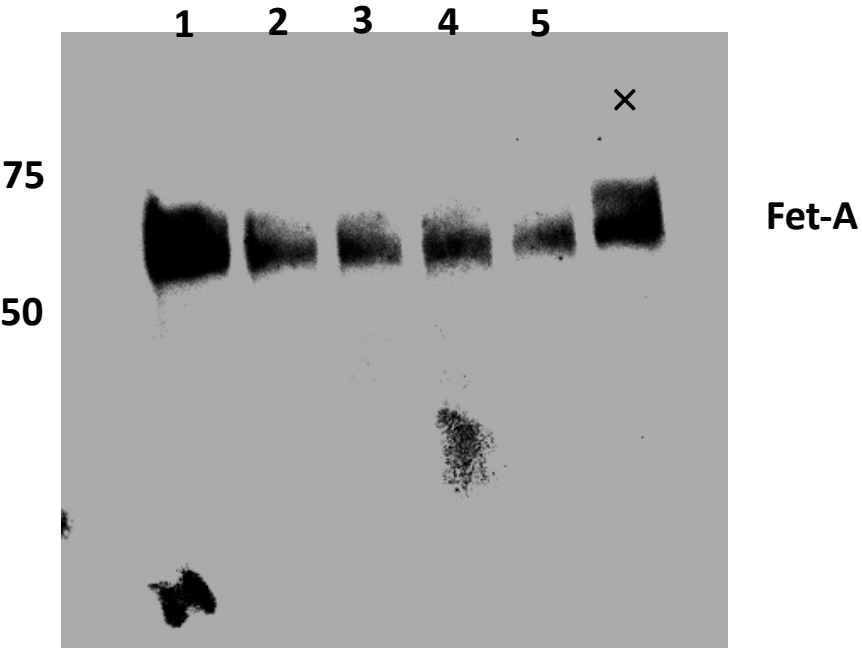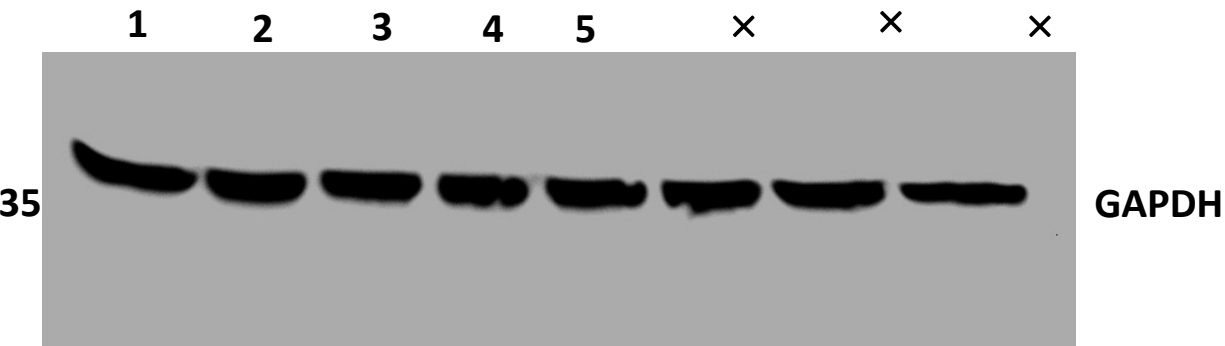

Figure 5F

HepG2 cells

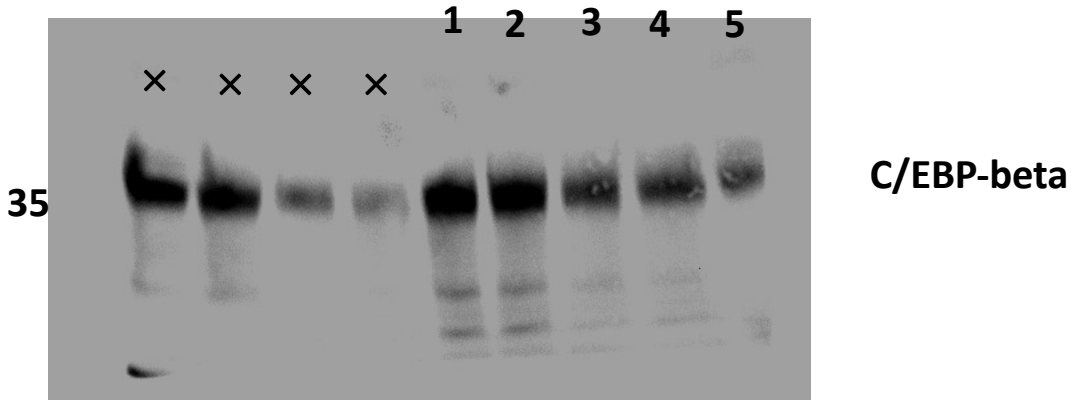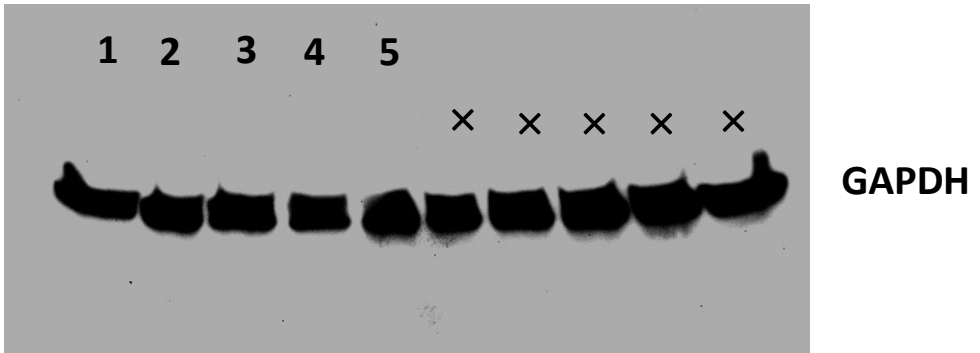

Figure 5H

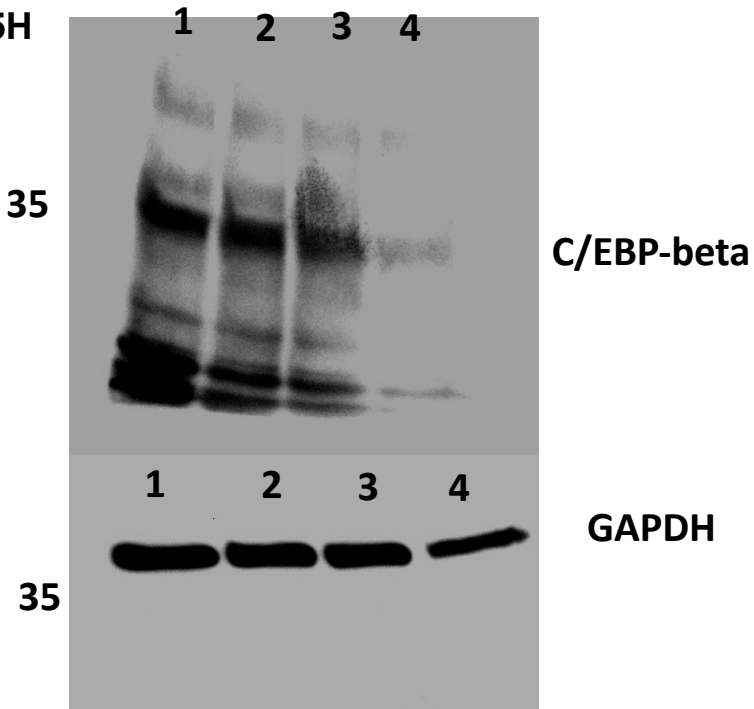

Suppl Figure 1A

HepG2 cells (12 hr)

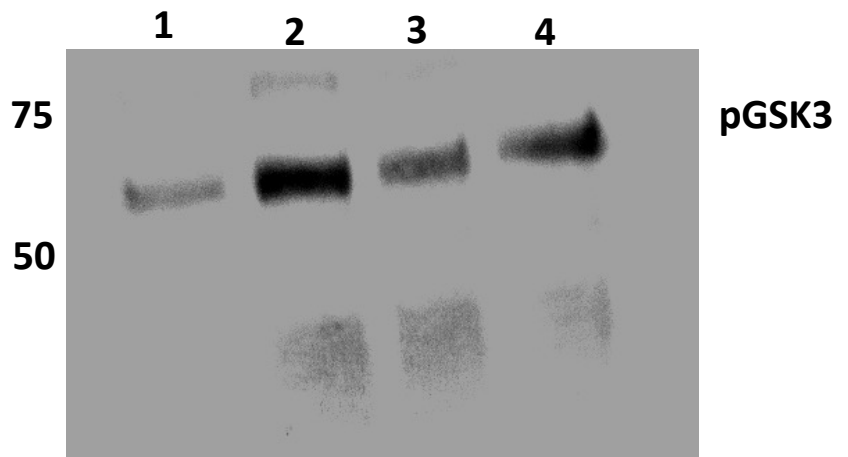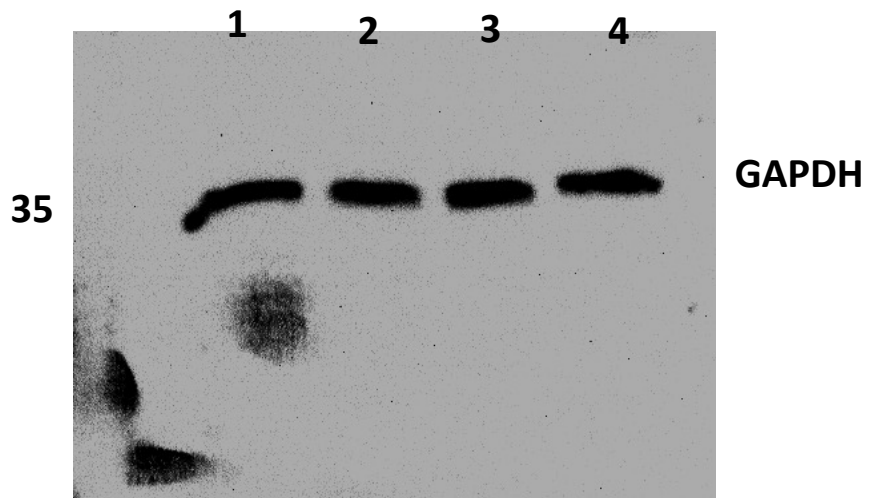



Suppl Figure 1B

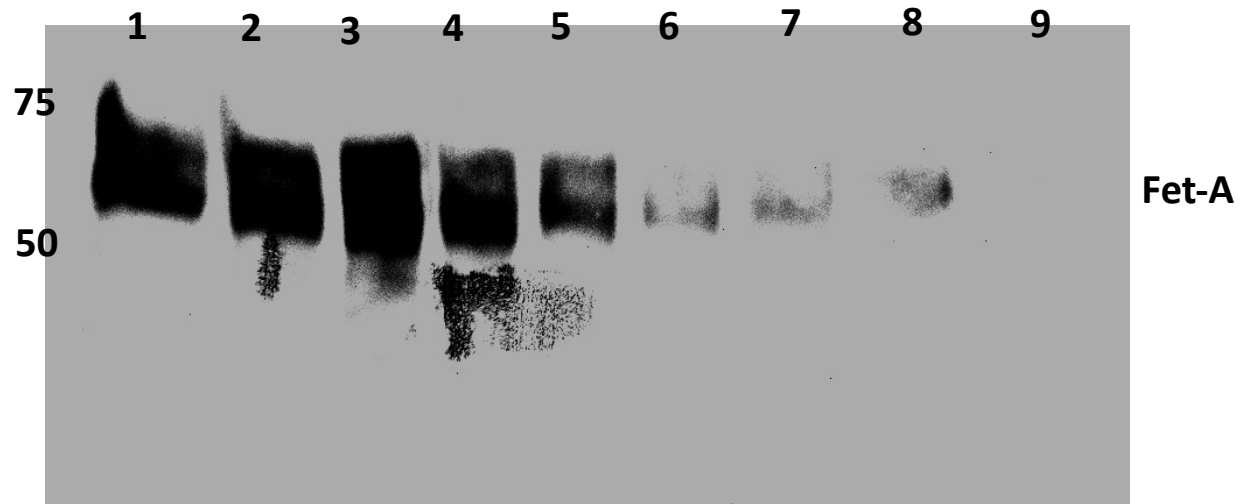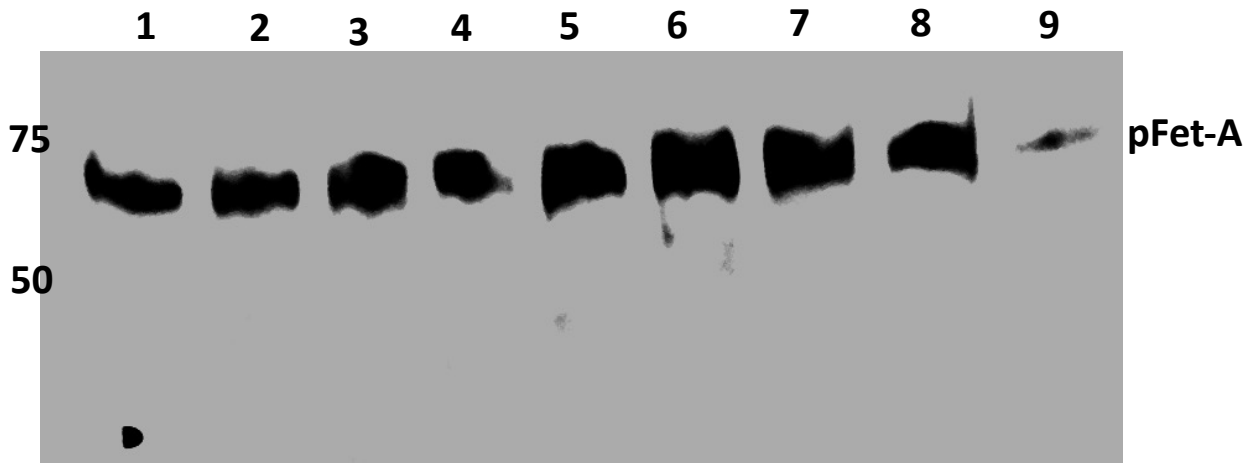

Supplement: pone.0266472.s002.pdf [file pone.0266472.s002.pdf]
